# Supplementary material for: Gut Microbiome of Children and Adolescents With Primary Sclerosing Cholangitis in Association With Ulcerative Colitis
Source: PubMed Central journal article supplement (PMC7893080; doi:10.3389/fimmu.2020.598152), 2021-02-05
Supplement: Image_1.pdf [file Image_1.pdf]

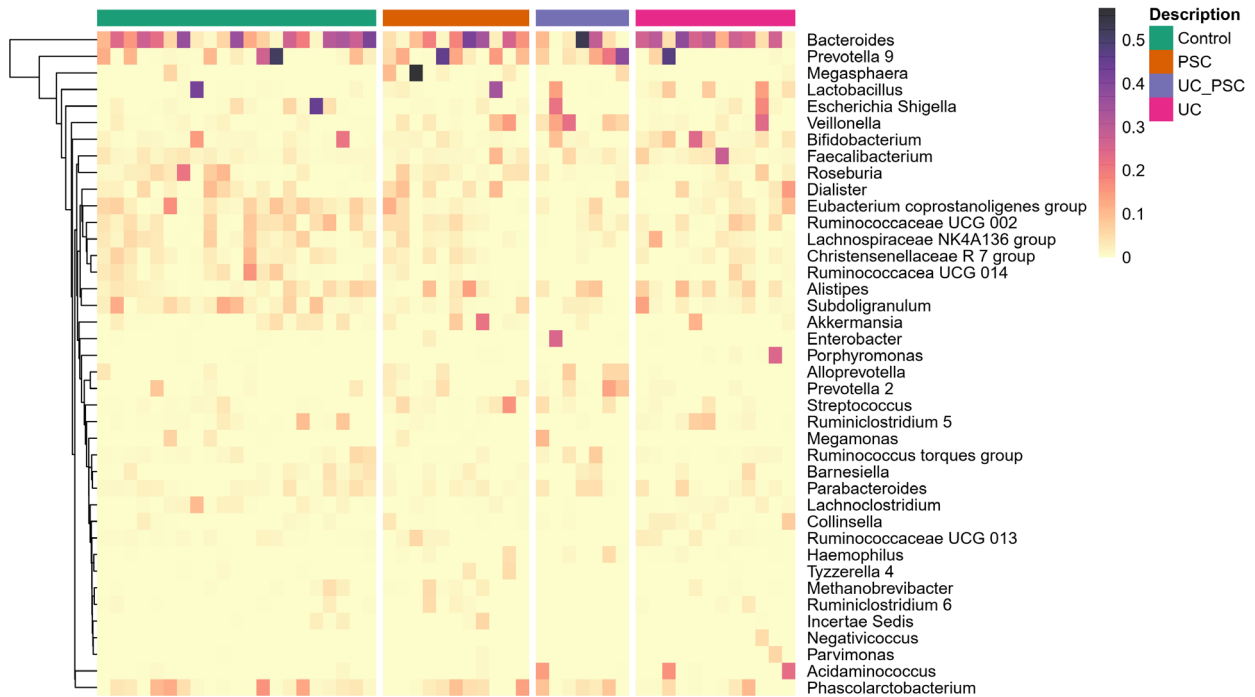

**Supplementary Figure 1.** Relative abundance heatmap of the most abundant bacterial genera identified in fecal samples.

**Legend:** The rows present the genera identified with maximum relative abundance higher than 0.05. Column represents the samples from patients and control groups; PSC = Primary Sclerosing Cholangitis; UC = Ulcerative Colitis.
